# Supplementary material
Source: Springer Nature journal article supplement (https://www.springermedizin.de/resource/supplementary/12936_2012_2489_MOESM10_ESM.pdf/9542768)

**a) Under 5 all-cause and malaria deaths in hospital**

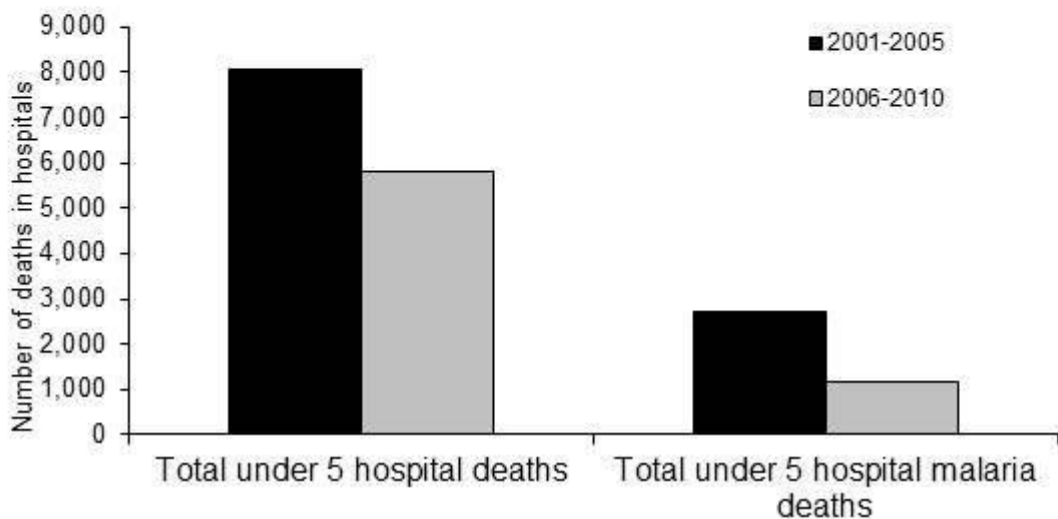

**b) Under 5 all-cause deaths (population based surveys)**

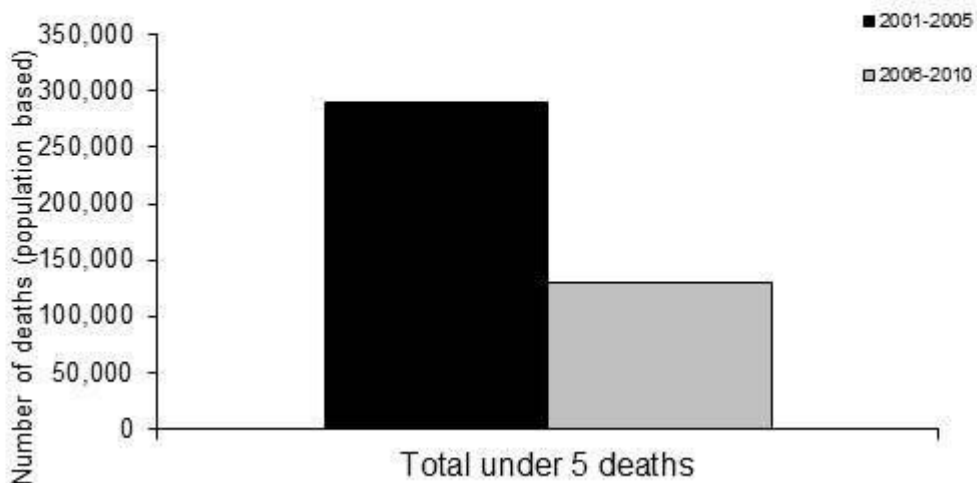

Supplement: MOESM10 [file 9542768]
